# Supplementary material for: Probing the impact of temperature on molecular events in a developmental system
Source: PubMed Central journal article supplement (PMC4541335; doi:10.1038/srep13124), 2015-08-19
Supplement: srep13124-s1.pdf [file srep13124-s1.pdf]

**SUPPLEMENTARY INFORMATION**

**Probing the impact of temperature on molecular events  
in a developmental system**

David Cheung<sup>1</sup> and Jun Ma<sup>1,2,\*</sup>

<sup>1</sup>Division of Biomedical Informatics

<sup>2</sup>Division of Developmental Biology

Cincinnati Children's Research Foundation

3333 Burnet Avenue

Cincinnati, OH 45229, USA

\* Author for correspondence: Divisions of Biomedical Informatics and Developmental Biology, Cincinnati Children's Hospital Research Foundation, 3333 Burnet Avenue, Cincinnati, OH 45229, USA; 513-636-7977 (phone); jun.ma@cchmc.org (email)

## Supplementary Figures

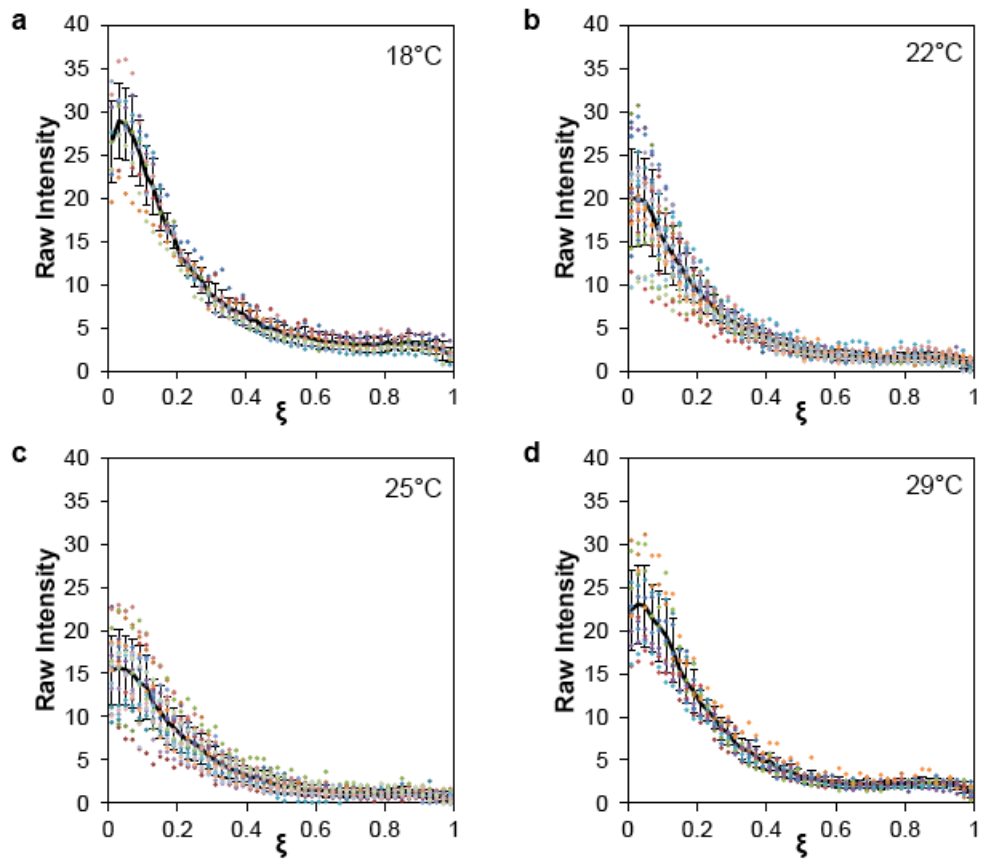

### Supplementary Fig. S1. Quantitative measurements of individual Bcd intensity profiles in embryos maturing at different temperatures

a-d) Shown are raw Bcd intensity profiles extracted from individual embryos maturing at the indicated temperatures (18°C, 22°C, 25°C, and 29°C, respectively), plotted as a function of fractional embryo length ( $\xi$ ). Also shown are the mean and standard deviation (s.d.).

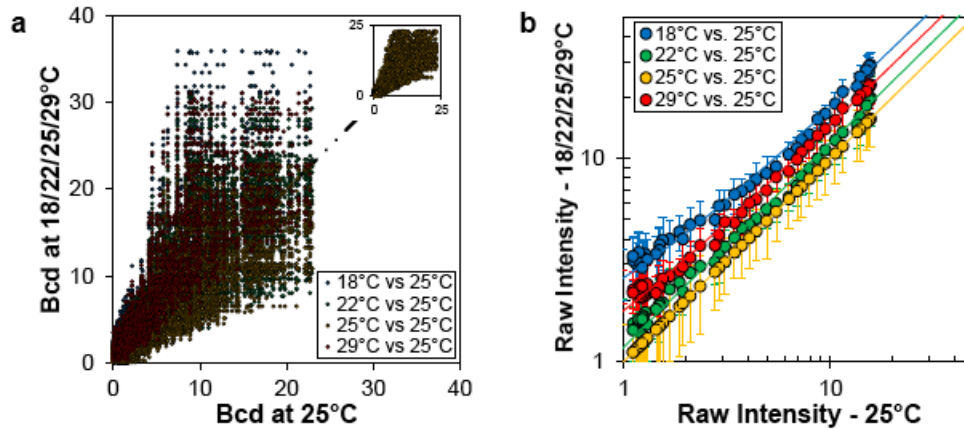

**Supplementary Fig. S2. Raw Bcd intensity relationships for embryos raised at different temperatures**

a) Shown is a scatter plot of the raw Bcd intensity values from embryos maturing at 18°C, 22°C, 25°C and 29°C plotted against those from embryos at 25°C at their relative positions. The data shown are from all pairwise combinations. The inset shows a scatter plot of intensity values of paired embryos maturing at 25°C. b) Shown are scatter plots of the mean Bcd intensities (and s.d.) between the indicated pairwise combinations of the thermal cohorts. The intensity data are shown in log scale, and a linear fit is shown for each pairwise comparison.

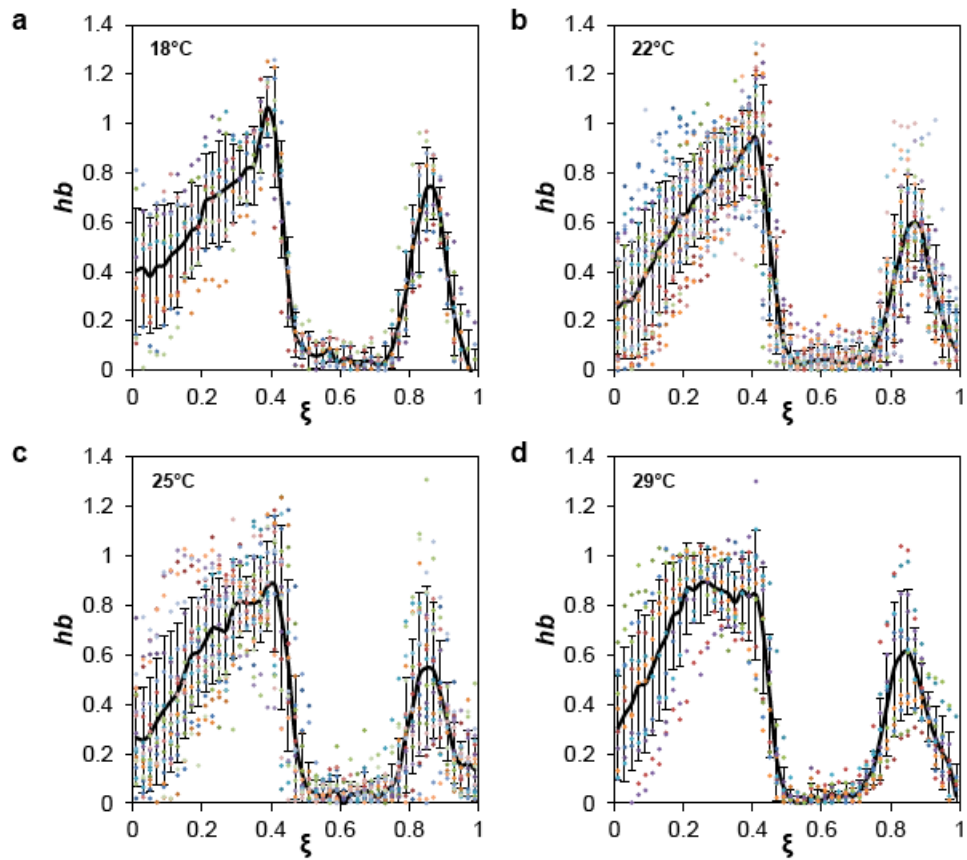

**Supplementary Fig. S3. *hb* mRNA FISH intensity profiles from individual embryos maturing at different temperatures**

a-d) Shown are normalized *hb* mRNA FISH intensity profiles extracted from individual embryos plotted as a function of fractional embryo length ( $\xi$ ). The data presented are for each of the indicated thermal cohorts separately. Also shown are the mean s.d.

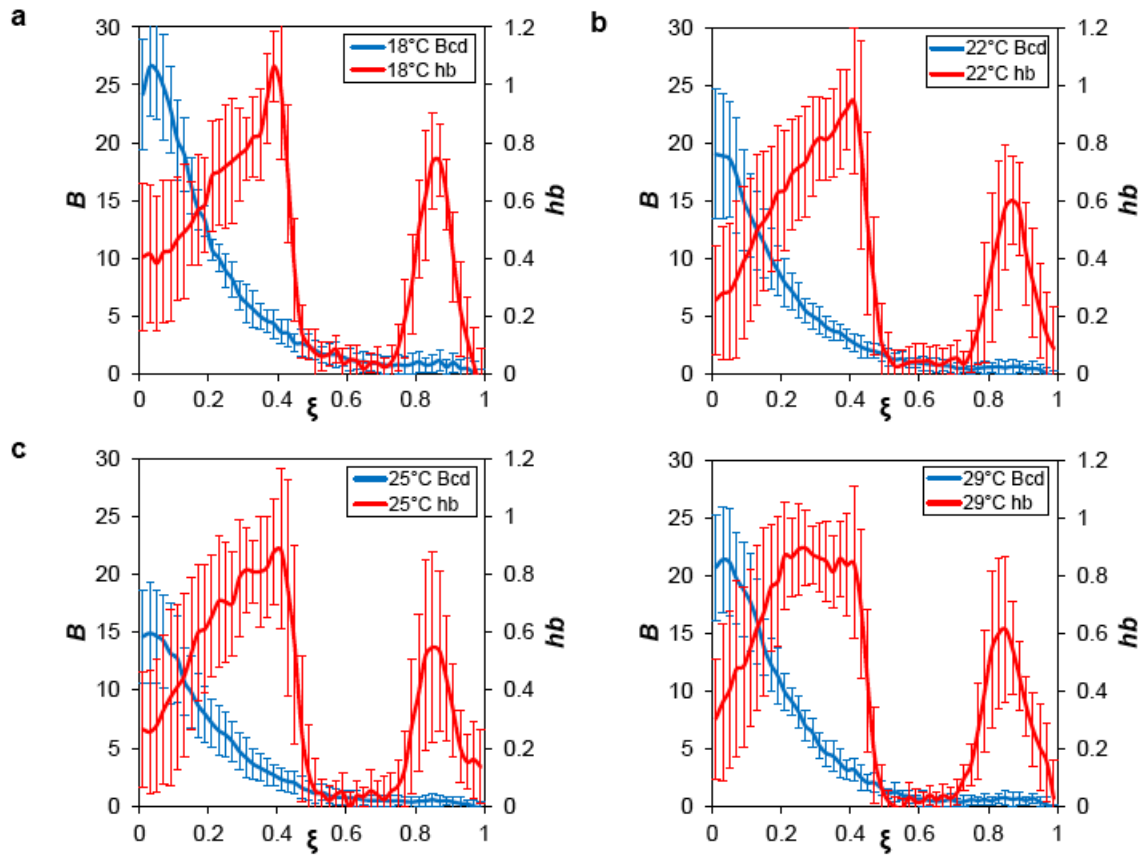

**Supplementary Fig. S4. Mean profiles of Bcd and *hb* from embryos maturing at different temperatures**

a-d) Shown are superimposed profiles of the mean Bcd intensities (blue, left scale) and the mean normalized *hb* FISH intensities (red, right scale), plotted as a function fractional egg length ( $\xi$ ). The panels show data for individual thermal cohorts separately. Error bars are s.d.
